# Supplementary material
Source: PubMed Central journal article supplement (PMC2819740)
Supplement: en.2009-0482_2.pdf [file en.2009-0482_2.pdf]

**Table 2**

|                     |                 | Fed             | Fasted              |
|---------------------|-----------------|-----------------|---------------------|
| Insulin, ng/ml      | Wild-type Lewis | 1.38 ± 0.23     | 0.18 ± 0.02 ***     |
|                     | <i>Dwarf</i>    | 0.65 ± 0.09 ### | 0.20 ± 0.05 **      |
| Ghrelin, ng/ml      | Wild-type Lewis | 1.13 ± 0.09     | 2.05 ± 0.21 ***     |
|                     | <i>Dwarf</i>    | 0.92 ± 0.03     | 1.30 ± 0.07 * ###   |
| Glucose, mg/dl      | Wild-type Lewis | 79.71 ± 2.83    | 50.08 ± 3.22 ***    |
|                     | <i>Dwarf</i>    | 86.63 ± 3.95    | 35.55 ± 3.07 *** ## |
| Triglyceride, mg/dl | Wild-type Lewis | 75.87 ± 6.96    | 39.67 ± 2.35 ***    |
|                     | <i>Dwarf</i>    | 70.46 ± 7.06    | 40.22 ± 2.03 ***    |

Plasma levels of insulin, ghrelin, glucose and triglycerides in fed and fasted rats.

Values are mean±SEM. \*, \*\*, \*\*\* P < 0.05, 0.01, 0.001 respectively vs. fed. #, ### P < 0.05,

0.001 respectively vs. wild-type Lewis rats.
